# Supplementary material for: Combined Exogenous Activation of Bovine Oocytes: Effects on Maturation-Promoting Factor, Mitogen-Activated Protein Kinases, and Embryonic Competence
Source: MDPI journal article supplement (doi:10.3390/ijms242115794), 2023-10-31
Supplement: s1 [file s1]

CDX2

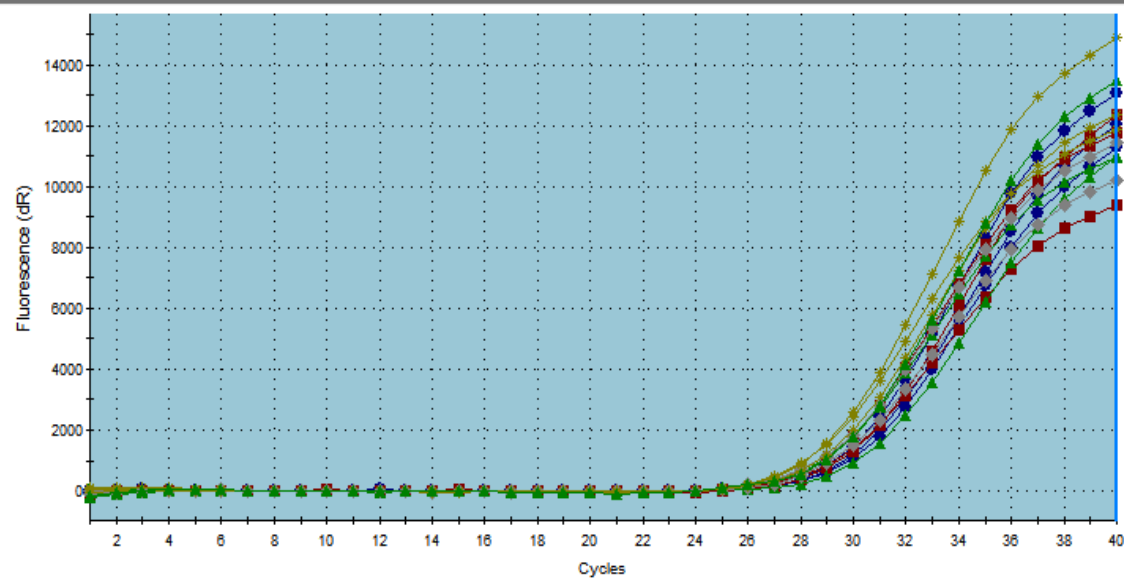

OCT.4

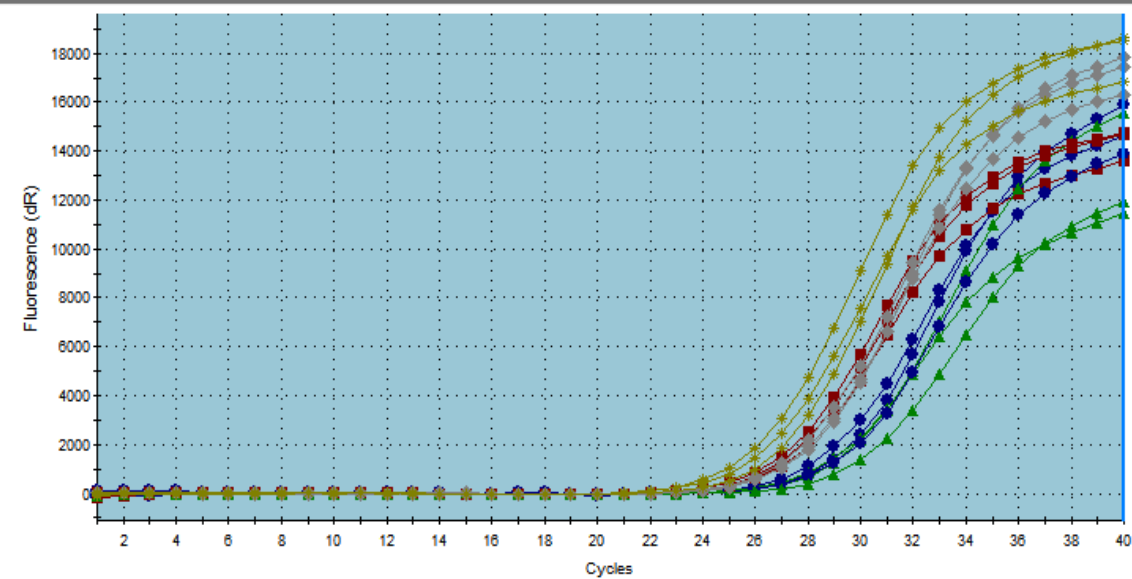

BCL2A

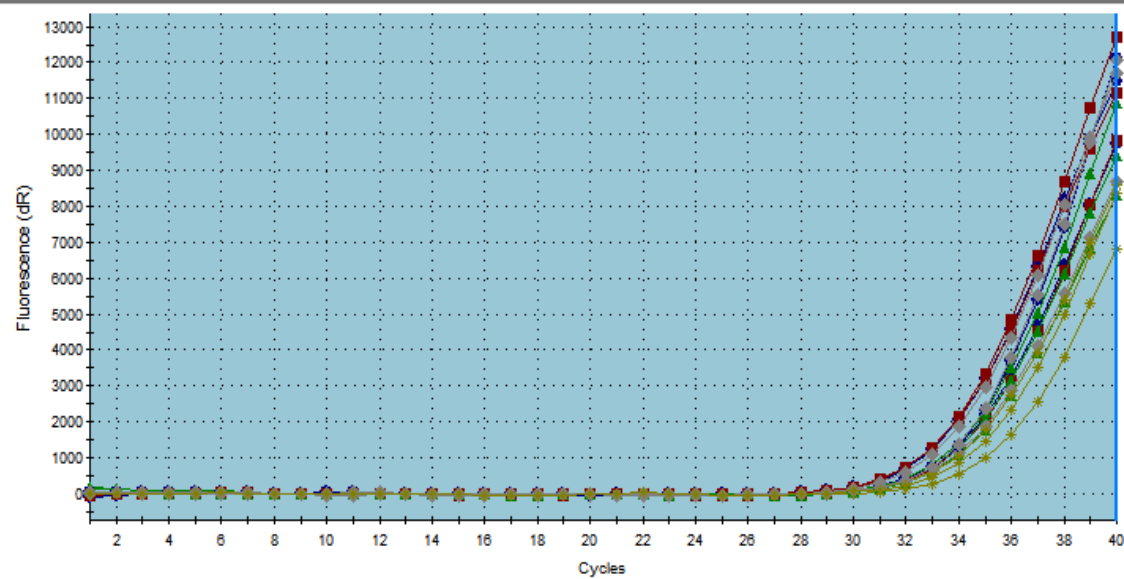

HMBS

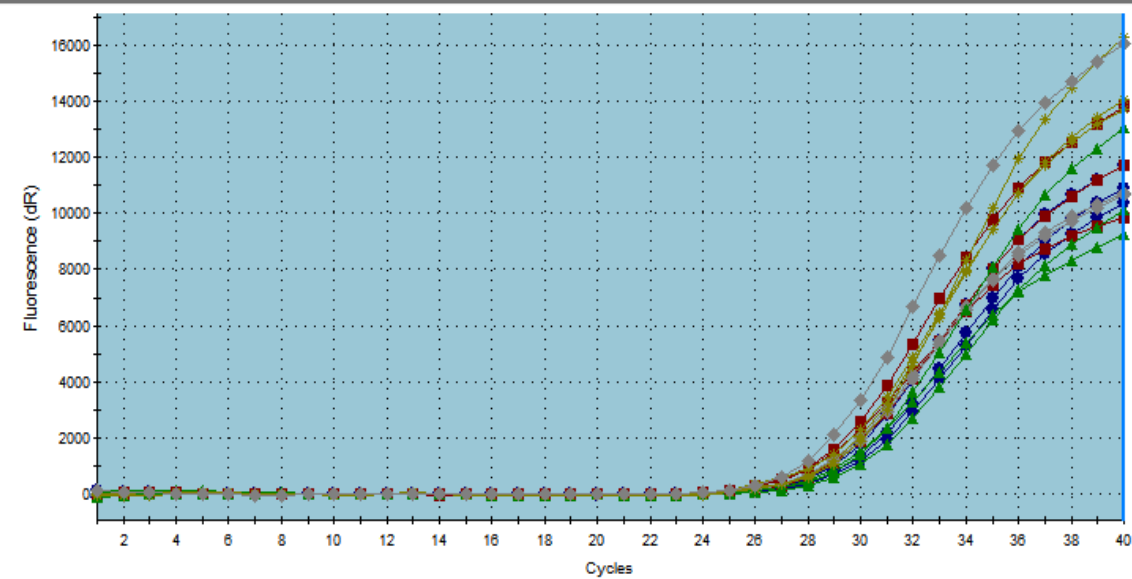

BAX

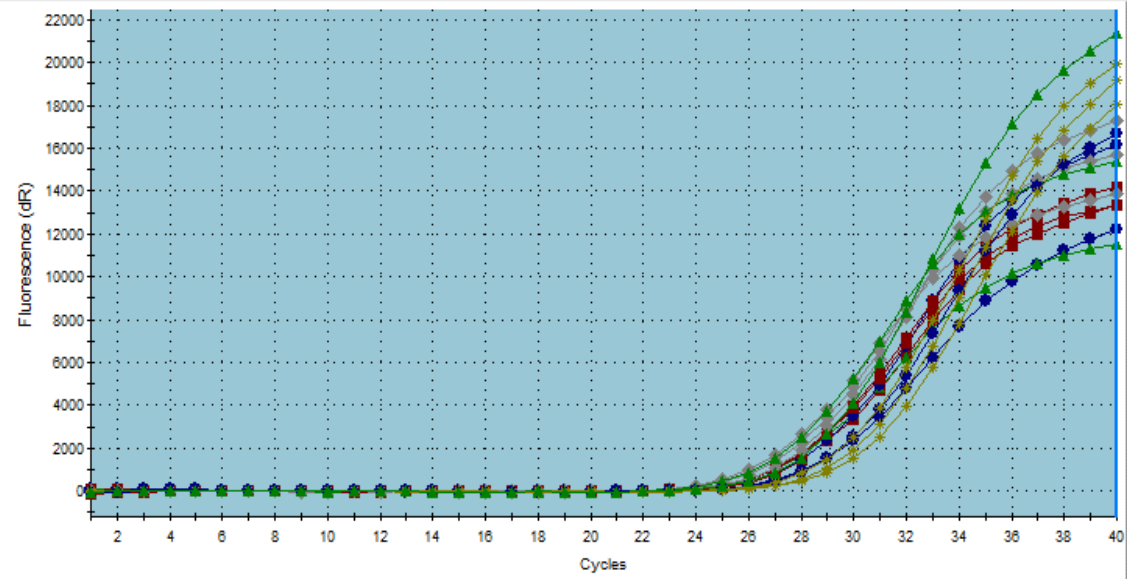

SF3A1

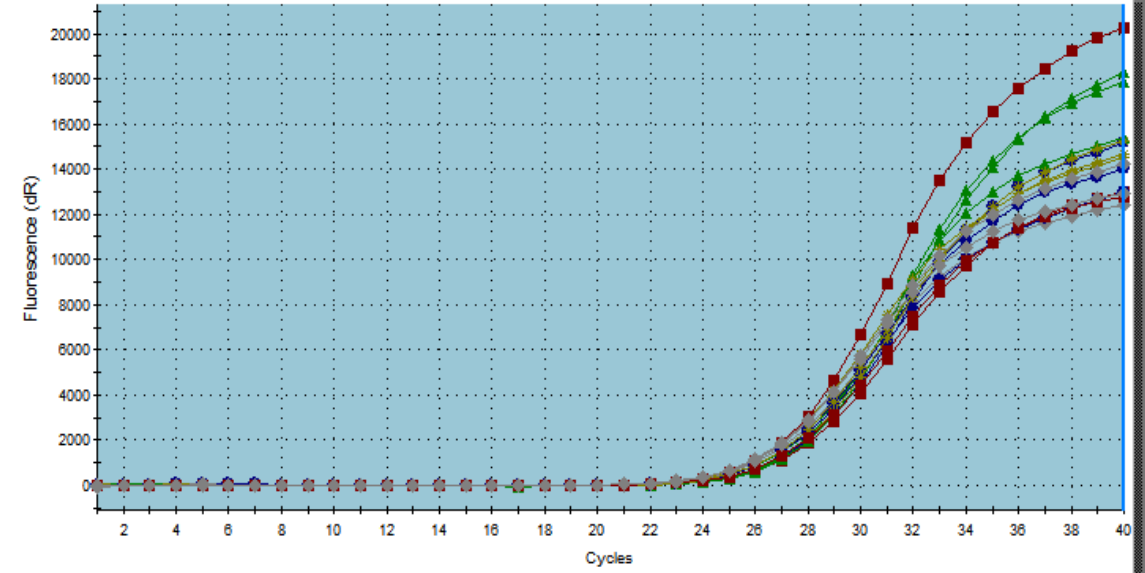

| Experiment                            | Well | Well Name    | Assay | Replicate | Ct (dR) | Rel. Quant. to Cal. (dR) |
|---------------------------------------|------|--------------|-------|-----------|---------|--------------------------|
| 1. Experimento Combinados Cecilia_1.2 | F3   | ANY          | BAX   | 3         | 25.89   | Calibrator               |
| 2. Experimento Combinados_2 Cecilia   | A3   | ANY          | BAX   | 3         | 24.49   | Calibrator               |
| 4. Experimento Combinados BAX 31-05-  | C1   | ANY          | BAX   | 3         | 25.21   | Calibrator               |
| 1. Experimento Combinados Cecilia_1.2 | A5   | ANY          | HMBS  | 5         | 27.54   | Normalizer               |
| 1. Experimento Combinados Cecilia_1.2 | A11  | ANY          | HMBS  | 5         | 27.13   | Normalizer               |
| 1. Experimento Combinados Cecilia_1.2 | F5   | ANY          | HMBS  | 5         | 26.74   | Normalizer               |
| 2. Experimento Combinados_2 Cecilia   | F6   | ANY          | SF3A1 | 6         | 22.98   | Normalizer               |
| 3. Experimento Combinados_3 Cecilia   | B1   | ANY          | SF3A1 | 6         | 23.29   | Normalizer               |
| 3. Experimento Combinados_3 Cecilia   | C1   | ANY          | SF3A1 | 6         | 23.54   | Normalizer               |
| 1. Experimento Combinados Cecilia_1.2 | C9   | ANY+CHX      | BAX   | 15        | 25.24   | 4.50                     |
| 2. Experimento Combinados_2 Cecilia   | C9   | ANY+CHX      | BAX   | 15        | 24.09   | 3.89                     |
| 2. Experimento Combinados_2 Cecilia   | H3   | ANY+CHX      | BAX   | 15        | 24.03   | 4.05                     |
| 1. Experimento Combinados Cecilia_1.2 | C11  | ANY+CHX      | HMBS  | 17        | 26.84   | Normalizer               |
| 1. Experimento Combinados Cecilia_1.2 | H5   | ANY+CHX      | HMBS  | 17        | 27.73   | Normalizer               |
| 2. Experimento Combinados_2 Cecilia   | H5   | ANY+CHX      | HMBS  | 17        | 26.75   | Normalizer               |
| 2. Experimento Combinados_2 Cecilia   | C6   | ANY+CHX      | SF3A1 | 18        | 26.49   | Normalizer               |
| 3. Experimento Combinados_3 Cecilia   | A3   | ANY+CHX      | SF3A1 | 18        | 26.15   | Normalizer               |
| 4. Experimento Combinados BAX 31-05-  | E4   | ANY+CHX      | SF3A1 | 18        | 24.99   | Normalizer               |
| 1. Experimento Combinados Cecilia_1.2 | E9   | ANY+CHX+DMAP | BAX   | 27        | 24.82   | 7.34                     |
| 2. Experimento Combinados_2 Cecilia   | E3   | ANY+CHX+DMAP | BAX   | 27        | 23.57   | 10.1                     |
| 4. Experimento Combinados BAX 31-05-  | G2   | ANY+CHX+DMAP | BAX   | 27        | 24.34   | 9.91                     |
| 4. Experimento Combinados BAX 31-05-  | C6   | ANY+CHX+DMAP | HMBS  | 29        | 29.64   | Normalizer               |
| 4. Experimento Combinados BAX 31-05-  | G5   | ANY+CHX+DMAP | HMBS  | 29        | 29.71   | Normalizer               |
| 4. Experimento Combinados BAX 31-05-  | G6   | ANY+CHX+DMAP | HMBS  | 29        | 29.91   | Normalizer               |
| 4. Experimento Combinados BAX 31-05-  | C4   | ANY+CHX+DMAP | SF3A1 | 30        | 24.82   | Normalizer               |
| 4. Experimento Combinados BAX 31-05-  | G3   | ANY+CHX+DMAP | SF3A1 | 30        | 25.52   | Normalizer               |
| 4. Experimento Combinados BAX 31-05-  | G4   | ANY+CHX+DMAP | SF3A1 | 30        | 25.31   | Normalizer               |
| 4. Experimento Combinados BAX 31-05-  | B2   | ANY+DMAP     | BAX   | 9         | 25.79   | 6.66                     |
| 4. Experimento Combinados BAX 31-05-  | F1   | ANY+DMAP     | BAX   | 9         | 26.27   | 4.78                     |
| 4. Experimento Combinados BAX 31-05-  | F2   | ANY+DMAP     | BAX   | 9         | 25.22   | 9.88                     |
| 1. Experimento Combinados Cecilia_1.2 | B11  | ANY+DMAP     | HMBS  | 11        | 25.77   | Normalizer               |
| 4. Experimento Combinados BAX 31-05-  | B6   | ANY+DMAP     | HMBS  | 11        | 30.73   | Normalizer               |

|                                      |     |          |       |    |       |            |
|--------------------------------------|-----|----------|-------|----|-------|------------|
| 4. Experimento Combinados BAX 31-05- | F5  | ANY+DMAP | HMBS  | 11 | 31.10 | Normalizer |
| 4. Experimento Combinados BAX 31-05- | B4  | ANY+DMAP | SF3A1 | 12 | 25.48 | Normalizer |
| 4. Experimento Combinados BAX 31-05- | F3  | ANY+DMAP | SF3A1 | 12 | 25.67 | Normalizer |
| 4. Experimento Combinados BAX 31-05- | F4  | ANY+DMAP | SF3A1 | 12 | 26.28 | Normalizer |
| 2. Experimento Combinados_2 Cecilia  | D3  | CHX+DMAP | BAX   | 21 | 23.25 | 1.85       |
| 2. Experimento Combinados_2 Cecilia  | D9  | CHX+DMAP | BAX   | 21 | 23.22 | 1.89       |
| 2. Experimento Combinados_2 Cecilia  | F9  | CHX+DMAP | BAX   | 21 | 23.96 | 1.14       |
| 2. Experimento Combinados_2 Cecilia  | D5  | CHX+DMAP | HMBS  | 23 | 25.97 | Normalizer |
| 2. Experimento Combinados_2 Cecilia  | D11 | CHX+DMAP | HMBS  | 23 | 25.45 | Normalizer |
| 2. Experimento Combinados_2 Cecilia  | F11 | CHX+DMAP | HMBS  | 23 | 25.83 | Normalizer |
| 2. Experimento Combinados_2 Cecilia  | D6  | CHX+DMAP | SF3A1 | 24 | 23.41 | Normalizer |
| 2. Experimento Combinados_2 Cecilia  | D12 | CHX+DMAP | SF3A1 | 24 | 23.91 | Normalizer |
| 2. Experimento Combinados_2 Cecilia  | F12 | CHX+DMAP | SF3A1 | 24 | 23.78 | Normalizer |

| Experiment                            | Well | Well Name    | Assay | Replicate | Ct (dR) | Rel. Quant. to Cal. (dR) |
|---------------------------------------|------|--------------|-------|-----------|---------|--------------------------|
| 1. Experimento Combinados Cecilia_1.2 | A10  | ANY          | BCL2A | 4         | 30.85   | Calibrator               |
| 1. Experimento Combinados Cecilia_1.2 | A5   | ANY          | HMBS  | 5         | 27.41   | Normalizer               |
| 1. Experimento Combinados Cecilia_1.2 | A11  | ANY          | HMBS  | 5         | 26.98   | Normalizer               |
| 1. Experimento Combinados Cecilia_1.2 | F5   | ANY          | HMBS  | 5         | 26.58   | Normalizer               |
| 2. Experimento Combinados_2 Cecilia   | A10  | ANY          | BCL2A | 4         | 30.17   | Calibrator               |
| 2. Experimento Combinados_2 Cecilia   | F4   | ANY          | BCL2A | 4         | 31.06   | Calibrator               |
| 2. Experimento Combinados_2 Cecilia   | A12  | ANY          | SF3A1 | 6         | 23.57   | Normalizer               |
| 3. Experimento Combinados_3 Cecilia   | B1   | ANY          | SF3A1 | 6         | 23.35   | Normalizer               |
| 3. Experimento Combinados_3 Cecilia   | C1   | ANY          | SF3A1 | 6         | 23.57   | Normalizer               |
| 1. Experimento Combinados Cecilia_1.2 | C4   | ANY+CHX      | BCL2A | 16        | 31.35   | 0.656                    |
| 1. Experimento Combinados Cecilia_1.2 | C10  | ANY+CHX      | BCL2A | 16        | 30.88   | 0.958                    |
| 1. Experimento Combinados Cecilia_1.2 | C11  | ANY+CHX      | HMBS  | 17        | 26.68   | Normalizer               |
| 1. Experimento Combinados Cecilia_1.2 | H5   | ANY+CHX      | HMBS  | 17        | 27.60   | Normalizer               |
| 2. Experimento Combinados_2 Cecilia   | C4   | ANY+CHX      | BCL2A | 16        | 31.04   | 0.622                    |
| 2. Experimento Combinados_2 Cecilia   | H5   | ANY+CHX      | HMBS  | 17        | 27.11   | Normalizer               |
| 2. Experimento Combinados_2 Cecilia   | C12  | ANY+CHX      | SF3A1 | 18        | 22.88   | Normalizer               |
| 2. Experimento Combinados_2 Cecilia   | H6   | ANY+CHX      | SF3A1 | 18        | 23.53   | Normalizer               |
| 3. Experimento Combinados_3 Cecilia   | B3   | ANY+CHX      | SF3A1 | 18        | 23.61   | Normalizer               |
| 1. Experimento Combinados Cecilia_1.2 | E4   | ANY+CHX+DMAP | BCL2A | 28        | 31.20   | 0.457                    |
| 1. Experimento Combinados Cecilia_1.2 | E10  | ANY+CHX+DMAP | BCL2A | 28        | 32.60   | 0.147                    |
| 1. Experimento Combinados Cecilia_1.2 | E5   | ANY+CHX+DMAP | HMBS  | 29        | 26.48   | Normalizer               |
| 1. Experimento Combinados Cecilia_1.2 | E11  | ANY+CHX+DMAP | HMBS  | 29        | 26.06   | Normalizer               |
| 2. Experimento Combinados_2 Cecilia   | E4   | ANY+CHX+DMAP | BCL2A | 28        | 31.81   | 0.183                    |
| 2. Experimento Combinados_2 Cecilia   | E5   | ANY+CHX+DMAP | HMBS  | 29        | 25.71   | Normalizer               |
| 2. Experimento Combinados_2 Cecilia   | E6   | ANY+CHX+DMAP | SF3A1 | 30        | 22.87   | Normalizer               |
| 1. Experimento Combinados Cecilia_1.2 | B10  | ANY+DMAP     | BCL2A | 10        | 31.08   | 0.590                    |
| 1. Experimento Combinados Cecilia_1.2 | B11  | ANY+DMAP     | HMBS  | 11        | 25.59   | Normalizer               |
| 1. Experimento Combinados Cecilia_1.2 | G5   | ANY+DMAP     | HMBS  | 11        | 26.55   | Normalizer               |
| 2. Experimento Combinados_2 Cecilia   | B4   | ANY+DMAP     | BCL2A | 10        | 29.99   | 1.03                     |
| 2. Experimento Combinados_2 Cecilia   | G4   | ANY+DMAP     | BCL2A | 10        | 29.95   | 1.06                     |
| 2. Experimento Combinados_2 Cecilia   | G5   | ANY+DMAP     | HMBS  | 11        | 25.78   | Normalizer               |

|                                       |     |              |       |    |       |            |
|---------------------------------------|-----|--------------|-------|----|-------|------------|
| 3. Experimento Combinados_3 Cecilia   | A2  | ANY+DMAP     | SF3A1 | 12 | 23.84 | Normalizer |
| 3. Experimento Combinados_3 Cecilia   | B2  | ANY+DMAP     | SF3A1 | 12 | 23.26 | Normalizer |
| 3. Experimento Combinados_3 Cecilia   | C2  | ANY+DMAP     | SF3A1 | 12 | 23.49 | Normalizer |
| 3. Experimento Combinados_3 Cecilia   | A5  | ANY+DMAP+CHX | SF3A1 | 30 | 23.04 | Normalizer |
| 3. Experimento Combinados_3 Cecilia   | C5  | ANY+DMAP+CHX | SF3A1 | 30 | 22.82 | Normalizer |
| 1. Experimento Combinados Cecilia_1.2 | D4  | CHX+DMAP     | BCL2A | 22 | 31.24 | 0.531      |
| 2. Experimento Combinados_2 Cecilia   | D4  | CHX+DMAP     | BCL2A | 22 | 30.25 | 0.926      |
| 2. Experimento Combinados_2 Cecilia   | F10 | CHX+DMAP     | BCL2A | 22 | 31.01 | 0.502      |
| 2. Experimento Combinados_2 Cecilia   | D5  | CHX+DMAP     | HMBS  | 23 | 26.36 | Normalizer |
| 2. Experimento Combinados_2 Cecilia   | D11 | CHX+DMAP     | HMBS  | 23 | 25.65 | Normalizer |
| 2. Experimento Combinados_2 Cecilia   | F11 | CHX+DMAP     | HMBS  | 23 | 26.05 | Normalizer |
| 2. Experimento Combinados_2 Cecilia   | D6  | CHX+DMAP     | SF3A1 | 24 | 23.29 | Normalizer |
| 2. Experimento Combinados_2 Cecilia   | D12 | CHX+DMAP     | SF3A1 | 24 | 23.82 | Normalizer |
| 2. Experimento Combinados_2 Cecilia   | F12 | CHX+DMAP     | SF3A1 | 24 | 23.69 | Normalizer |

| Experiment                            | Well | Well Name    | Assay | Replicate | Ct (dR) | Rel. Quant. to Cal. (dR) |
|---------------------------------------|------|--------------|-------|-----------|---------|--------------------------|
| 1. Experimento Combinados Cecilia_1.2 | A1   | ANY          | CDX2  | 1         | 26.77   | Calibrator               |
| 1. Experimento Combinados Cecilia_1.2 | A7   | ANY          | CDX2  | 1         | 26.81   | Calibrator               |
| 1. Experimento Combinados Cecilia_1.2 | F1   | ANY          | CDX2  | 1         | 26.99   | Calibrator               |
| 1. Experimento Combinados Cecilia_1.2 | A5   | ANY          | HMBS  | 5         | 27.41   | Normalizer               |
| 1. Experimento Combinados Cecilia_1.2 | A11  | ANY          | HMBS  | 5         | 26.98   | Normalizer               |
| 1. Experimento Combinados Cecilia_1.2 | F5   | ANY          | HMBS  | 5         | 26.58   | Normalizer               |
| 2. Experimento Combinados_2 Cecilia   | A12  | ANY          | SF3A1 | 6         | 23.57   | Normalizer               |
| 3. Experimento Combinados_3 Cecilia   | B1   | ANY          | SF3A1 | 6         | 23.35   | Normalizer               |
| 3. Experimento Combinados_3 Cecilia   | C1   | ANY          | SF3A1 | 6         | 23.57   | Normalizer               |
| 1. Experimento Combinados Cecilia_1.2 | C7   | ANY+CHX      | CDX2  | 13        | 25.79   | 2.17                     |
| 1. Experimento Combinados Cecilia_1.2 | H1   | ANY+CHX      | CDX2  | 13        | 27.29   | 0.727                    |
| 1. Experimento Combinados Cecilia_1.2 | C11  | ANY+CHX      | HMBS  | 17        | 26.68   | Normalizer               |
| 1. Experimento Combinados Cecilia_1.2 | H5   | ANY+CHX      | HMBS  | 17        | 27.60   | Normalizer               |
| 2. Experimento Combinados_2 Cecilia   | H1   | ANY+CHX      | CDX2  | 13        | 25.59   | 0.00                     |
| 2. Experimento Combinados_2 Cecilia   | H5   | ANY+CHX      | HMBS  | 17        | 27.11   | Normalizer               |
| 2. Experimento Combinados_2 Cecilia   | C12  | ANY+CHX      | SF3A1 | 18        | 22.88   | Normalizer               |
| 2. Experimento Combinados_2 Cecilia   | H6   | ANY+CHX      | SF3A1 | 18        | 23.53   | Normalizer               |
| 3. Experimento Combinados_3 Cecilia   | B3   | ANY+CHX      | SF3A1 | 18        | 23.61   | Normalizer               |
| 1. Experimento Combinados Cecilia_1.2 | E1   | ANY+CHX+DMAP | CDX2  | 25        | 25.94   | 1.20                     |
| 1. Experimento Combinados Cecilia_1.2 | E7   | ANY+CHX+DMAP | CDX2  | 25        | 25.34   | 1.86                     |
| 1. Experimento Combinados Cecilia_1.2 | G7   | ANY+CHX+DMAP | CDX2  | 25        | 25.35   | 2.47                     |
| 1. Experimento Combinados Cecilia_1.2 | E5   | ANY+CHX+DMAP | HMBS  | 29        | 26.48   | Normalizer               |
| 1. Experimento Combinados Cecilia_1.2 | E11  | ANY+CHX+DMAP | HMBS  | 29        | 26.06   | Normalizer               |
| 2. Experimento Combinados_2 Cecilia   | E5   | ANY+CHX+DMAP | HMBS  | 29        | 25.71   | Normalizer               |
| 2. Experimento Combinados_2 Cecilia   | E6   | ANY+CHX+DMAP | SF3A1 | 30        | 22.87   | Normalizer               |
| 1. Experimento Combinados Cecilia_1.2 | B1   | ANY+DMAP     | CDX2  | 7         | 26.91   | 0.694                    |
| 1. Experimento Combinados Cecilia_1.2 | B7   | ANY+DMAP     | CDX2  | 7         | 26.21   | 1.15                     |
| 1. Experimento Combinados Cecilia_1.2 | G1   | ANY+DMAP     | CDX2  | 7         | 26.04   | 1.31                     |
| 1. Experimento Combinados Cecilia_1.2 | B11  | ANY+DMAP     | HMBS  | 11        | 25.59   | Normalizer               |
| 1. Experimento Combinados Cecilia_1.2 | G5   | ANY+DMAP     | HMBS  | 11        | 26.55   | Normalizer               |
| 2. Experimento Combinados_2 Cecilia   | G5   | ANY+DMAP     | HMBS  | 11        | 25.78   | Normalizer               |

|                                       |     |              |       |    |       |            |
|---------------------------------------|-----|--------------|-------|----|-------|------------|
| 3. Experimento Combinados_3 Cecilia   | A2  | ANY+DMAP     | SF3A1 | 12 | 23.84 | Normalizer |
| 3. Experimento Combinados_3 Cecilia   | B2  | ANY+DMAP     | SF3A1 | 12 | 23.26 | Normalizer |
| 3. Experimento Combinados_3 Cecilia   | C2  | ANY+DMAP     | SF3A1 | 12 | 23.49 | Normalizer |
| 3. Experimento Combinados_3 Cecilia   | A5  | ANY+DMAP+CHX | SF3A1 | 30 | 23.04 | Normalizer |
| 3. Experimento Combinados_3 Cecilia   | C5  | ANY+DMAP+CHX | SF3A1 | 30 | 22.82 | Normalizer |
| 1. Experimento Combinados Cecilia_1.2 | D1  | CHX+DMAP     | CDX2  | 19 | 25.62 | 1.82       |
| 1. Experimento Combinados Cecilia_1.2 | D7  | CHX+DMAP     | CDX2  | 19 | 26.24 | 1.15       |
| 1. Experimento Combinados Cecilia_1.2 | F7  | CHX+DMAP     | CDX2  | 19 | 26.29 | 1.11       |
| 2. Experimento Combinados_2 Cecilia   | D5  | CHX+DMAP     | HMBS  | 23 | 26.36 | Normalizer |
| 2. Experimento Combinados_2 Cecilia   | D11 | CHX+DMAP     | HMBS  | 23 | 25.65 | Normalizer |
| 2. Experimento Combinados_2 Cecilia   | F11 | CHX+DMAP     | HMBS  | 23 | 26.05 | Normalizer |
| 2. Experimento Combinados_2 Cecilia   | D6  | CHX+DMAP     | SF3A1 | 24 | 23.29 | Normalizer |
| 2. Experimento Combinados_2 Cecilia   | D12 | CHX+DMAP     | SF3A1 | 24 | 23.82 | Normalizer |
| 2. Experimento Combinados_2 Cecilia   | F12 | CHX+DMAP     | SF3A1 | 24 | 23.69 | Normalizer |



| Experiment                            | Well | Well Name    | Assay | Replicate | Ct (dR) | Rel. Quant. to Cal. (dR) |
|---------------------------------------|------|--------------|-------|-----------|---------|--------------------------|
| 1. Experimento Combinados Cecilia_1.2 | A8   | ANY          | OCT.4 | 2         | 24.96   | Calibrator               |
| 1. Experimento Combinados Cecilia_1.2 | F2   | ANY          | OCT.4 | 2         | 25.58   | Calibrator               |
| 1. Experimento Combinados Cecilia_1.2 | A5   | ANY          | HMBS  | 5         | 27.41   | Normalizer               |
| 1. Experimento Combinados Cecilia_1.2 | A11  | ANY          | HMBS  | 5         | 26.98   | Normalizer               |
| 1. Experimento Combinados Cecilia_1.2 | F5   | ANY          | HMBS  | 5         | 26.58   | Normalizer               |
| 2. Experimento Combinados_2 Cecilia   | A8   | ANY          | OCT.4 | 2         | 25.98   | Calibrator               |
| 2. Experimento Combinados_2 Cecilia   | A12  | ANY          | SF3A1 | 6         | 23.57   | Normalizer               |
| 3. Experimento Combinados_3 Cecilia   | B1   | ANY          | SF3A1 | 6         | 23.35   | Normalizer               |
| 3. Experimento Combinados_3 Cecilia   | C1   | ANY          | SF3A1 | 6         | 23.57   | Normalizer               |
| 1. Experimento Combinados Cecilia_1.2 | C8   | ANY+CHX      | OCT.4 | 14        | 25.12   | 1.08                     |
| 1. Experimento Combinados Cecilia_1.2 | H2   | ANY+CHX      | OCT.4 | 14        | 25.54   | 0.830                    |
| 1. Experimento Combinados Cecilia_1.2 | C11  | ANY+CHX      | HMBS  | 17        | 26.68   | Normalizer               |
| 1. Experimento Combinados Cecilia_1.2 | H5   | ANY+CHX      | HMBS  | 17        | 27.60   | Normalizer               |
| 2. Experimento Combinados_2 Cecilia   | H2   | ANY+CHX      | OCT.4 | 14        | 27.18   | 0.436                    |
| 2. Experimento Combinados_2 Cecilia   | H5   | ANY+CHX      | HMBS  | 17        | 27.11   | Normalizer               |
| 2. Experimento Combinados_2 Cecilia   | C12  | ANY+CHX      | SF3A1 | 18        | 22.88   | Normalizer               |
| 2. Experimento Combinados_2 Cecilia   | H6   | ANY+CHX      | SF3A1 | 18        | 23.53   | Normalizer               |
| 3. Experimento Combinados_3 Cecilia   | B3   | ANY+CHX      | SF3A1 | 18        | 23.61   | Normalizer               |
| 1. Experimento Combinados Cecilia_1.2 | E5   | ANY+CHX+DMAP | HMBS  | 29        | 26.48   | Normalizer               |
| 1. Experimento Combinados Cecilia_1.2 | E11  | ANY+CHX+DMAP | HMBS  | 29        | 26.06   | Normalizer               |
| 2. Experimento Combinados_2 Cecilia   | E2   | ANY+CHX+DMAP | OCT.4 | 26        | 23.67   | 2.14                     |
| 2. Experimento Combinados_2 Cecilia   | E8   | ANY+CHX+DMAP | OCT.4 | 26        | 22.69   | 3.93                     |
| 2. Experimento Combinados_2 Cecilia   | G8   | ANY+CHX+DMAP | OCT.4 | 26        | 22.76   | 3.76                     |
| 2. Experimento Combinados_2 Cecilia   | E5   | ANY+CHX+DMAP | HMBS  | 29        | 25.71   | Normalizer               |
| 2. Experimento Combinados_2 Cecilia   | E6   | ANY+CHX+DMAP | SF3A1 | 30        | 22.87   | Normalizer               |
| 1. Experimento Combinados Cecilia_1.2 | B8   | ANY+DMAP     | OCT.4 | 8         | 23.71   | 1.88                     |
| 1. Experimento Combinados Cecilia_1.2 | B11  | ANY+DMAP     | HMBS  | 11        | 25.59   | Normalizer               |
| 1. Experimento Combinados Cecilia_1.2 | G5   | ANY+DMAP     | HMBS  | 11        | 26.55   | Normalizer               |
| 2. Experimento Combinados_2 Cecilia   | B8   | ANY+DMAP     | OCT.4 | 8         | 23.63   | 2.82                     |
| 2. Experimento Combinados_2 Cecilia   | G2   | ANY+DMAP     | OCT.4 | 8         | 24.11   | 2.10                     |
| 2. Experimento Combinados_2 Cecilia   | G5   | ANY+DMAP     | HMBS  | 11        | 25.78   | Normalizer               |

|                                     |     |              |       |    |       |            |
|-------------------------------------|-----|--------------|-------|----|-------|------------|
| 3. Experimento Combinados_3 Cecilia | A2  | ANY+DMAP     | SF3A1 | 12 | 23.84 | Normalizer |
| 3. Experimento Combinados_3 Cecilia | B2  | ANY+DMAP     | SF3A1 | 12 | 23.26 | Normalizer |
| 3. Experimento Combinados_3 Cecilia | C2  | ANY+DMAP     | SF3A1 | 12 | 23.49 | Normalizer |
| 3. Experimento Combinados_3 Cecilia | A5  | ANY+DMAP+CHX | SF3A1 | 30 | 23.04 | Normalizer |
| 3. Experimento Combinados_3 Cecilia | C5  | ANY+DMAP+CHX | SF3A1 | 30 | 22.82 | Normalizer |
| 2. Experimento Combinados_2 Cecilia | D2  | CHX+DMAP     | OCT.4 | 20 | 24.48 | 1.86       |
| 2. Experimento Combinados_2 Cecilia | D8  | CHX+DMAP     | OCT.4 | 20 | 24.43 | 1.91       |
| 2. Experimento Combinados_2 Cecilia | F8  | CHX+DMAP     | OCT.4 | 20 | 24.27 | 2.12       |
| 2. Experimento Combinados_2 Cecilia | D5  | CHX+DMAP     | HMBS  | 23 | 26.36 | Normalizer |
| 2. Experimento Combinados_2 Cecilia | D11 | CHX+DMAP     | HMBS  | 23 | 25.65 | Normalizer |
| 2. Experimento Combinados_2 Cecilia | F11 | CHX+DMAP     | HMBS  | 23 | 26.05 | Normalizer |
| 2. Experimento Combinados_2 Cecilia | D6  | CHX+DMAP     | SF3A1 | 24 | 23.29 | Normalizer |
| 2. Experimento Combinados_2 Cecilia | D12 | CHX+DMAP     | SF3A1 | 24 | 23.82 | Normalizer |
| 2. Experimento Combinados_2 Cecilia | F12 | CHX+DMAP     | SF3A1 | 24 | 23.69 | Normalizer |
